# Supplementary material for: Myeloid/lymphoid neoplasms with eosinophilia/basophilia and ETV6-ABL1 fusion: cell-of-origin and response to tyrosine kinase inhibition
Source: PubMed Central journal article supplement — Haematologica. 2020 Apr 16;106(2):614–8. doi: 10.3324/haematol.2020.249649 (PMC7849580; doi:10.3324/haematol.2020.249649), 2020-04-16
Supplement: 2020_249649_YAO_SUPPL.pdf [file 2020_249649_YAO_SUPPL.pdf]

**Myeloid/lymphoid neoplasms with eosinophilia/basophilia and *ETV6-ABL1* fusion: cell-of-origin and response to tyrosine kinase inhibition**

Jinjuan Yao,<sup>1,\*</sup> Lianrong Xu,<sup>1,\*</sup> Umut Aypar,<sup>1,\*</sup> Howard J. Meyerson,<sup>2</sup> Dory Londono,<sup>1</sup> Qi Gao,<sup>1</sup> Jeeyeon Baik,<sup>1</sup> James Dietz,<sup>1</sup> Ryma Benayed,<sup>1</sup> Allison Sigler,<sup>1</sup> Mariko Yabe,<sup>1</sup> Ahmet Dogan,<sup>1</sup> Maria E. Arcila,<sup>1</sup> Mikhail Roshal,<sup>1</sup> Yanming Zhang,<sup>1</sup> Michael J. Mauro<sup>3</sup> and Wenbin Xiao<sup>1</sup>

<sup>1</sup>Department of Pathology, Memorial Sloan-Kettering Cancer Center, New York, NY; <sup>2</sup>Department of Pathology, University Hospitals of Cleveland, Cleveland, OH and <sup>3</sup>Department of Medicine, Memorial Sloan-Kettering Cancer Center, New York, NY, USA

\*JY, LX and UA contributed equally as co-first authors.

Correspondence: WENBIN XIAO - xiaow@mskcc.org

doi:10.3324/haematol.2020.249649

**Table S1: *ETV6* breakpoints in myeloid neoplasms with *ETV6-ABL1* fusion**

| Gene 1      | Gene 2      | Position 1          | Position 2          | Transcript 1 | Exon No. | Transcript 1<br>Strand 1 | Transcript 2 | Exon<br>No. 2 | Transcript<br>Strand 2 | Fusion Junction<br>sequence                            | Frameshift<br>class |
|-------------|-------------|---------------------|---------------------|--------------|----------|--------------------------|--------------|---------------|------------------------|--------------------------------------------------------|---------------------|
| <i>ETV6</i> | <i>ABL1</i> | Chr 12:<br>12022903 | Chr 9:<br>133729451 | NM_001987    | 5        | +                        | NM_005157    | 2             | +                      | GCCCATTTGGGAGAAT<br>AGCAG/<br>AAGCCCTTCAGCGGC<br>CAGTA | In frame            |

**Table S2: Mutational Profiling of myeloid neoplasms with *ETV6-ABL1* fusion**

| Case No. | Genes         | Transcript ID | Exon No. | AA Change   | cDNA Change | VAF (%) | Biological effect       | Clinical Implications             |
|----------|---------------|---------------|----------|-------------|-------------|---------|-------------------------|-----------------------------------|
| 1        | <i>ARID2</i>  | NM_152641     | 15       | S731Vfs*27  | 2190delT    | 8       | Likely loss of function | Likely oncogenic                  |
|          | <i>TP53</i>   | NM_000546     | 3        | V31I        | 91G>A       | 47      | NA                      | Variant of uncertain significance |
| 2        | <i>ARID2</i>  | NM_152641     | 15       | N697Kfs*10  | 2090dupA    | 36      | Likely loss of function | Likely oncogenic                  |
|          | <i>CDKN1B</i> | NM_004064     | 1        | P133Qfs*12  | 398delC     | 39      | Likely loss of function | Likely oncogenic                  |
| 5        | <i>SETD2</i>  | NM_014159     | 17       | S2382Lfs*47 | 7143dupC    | 3       | Likely loss of function | Likely oncogenic                  |
| 6        | <i>CCT6B</i>  | NM_006584     | NA       | NA          | 615-2A>G    | NA      | NA                      | Likely benign                     |

Table S3 Clinical features of myeloid/lymphoid neoplasms with *ETV6-ABL1* fusion

| Reference | Age at Dx(years) | Gender | Initial CBC   | Initial Dx | Eosinophilia (% in PB) | absolute EO (K/mcL in PB) | Basophils (% in PB) | Progression   | Splenomegaly | TKI                 | Other treatment                                | Survival                          |
|-----------|------------------|--------|---------------|------------|------------------------|---------------------------|---------------------|---------------|--------------|---------------------|------------------------------------------------|-----------------------------------|
| 1         | 32               | M      | 27/NA/454     | CML        | 9                      | 2.4                       | 3                   |               | no           | No                  |                                                | Alive (CR >3Y)                    |
| 2         | 59               | M      | 27/6.6/344    | CML        | 15                     | 4.1                       | 5                   |               | yes          | No                  | HU-Corticosteriod and Thioguanine              | Died (13M)                        |
| 3         | 53               | M      | 22/13.1/378   | CML        | 11                     | 2.4                       | 0                   |               | yes          | No                  | HU/IFN,splenectomy                             | Alive (5Y)                        |
| 4         | 44               | F      | 37/12.3/370   | CML        | 9                      | 3.3                       | 1                   |               | no           | No                  | HU/IFN                                         | Alive (3M)                        |
| 5         | 38               | M      | Within normal | CML-BC     | NA                     | NA                        | NA                  | AML           | yes          | Imatinib            | HU-chemotherapy(FLAG)                          | Died (6M)                         |
| 6         | 79               | M      | 41.6/14/202   | aCML       | 6                      | 2.5                       | 0                   | AML           | NA           | Imatinib            | NA                                             | Died(13M)                         |
| 7         | 36               | M      | 238/9.6/88    | CML        | 13                     | 30.9                      | 4                   | AML           | yes          | Imatinib            | chemotherapy                                   | Died(8M)                          |
| 8         | 72               | M      | 6/9.8/32      | CML        | yes                    | NA                        | NA                  | B-ALL         | NA           | Imatinib            |                                                | Died (2M)                         |
| 9         | 26               | F      | 40/ NA/NA     | MPN        | yes (marrow 20-30)     | NA                        | NA                  | B-ALL         | NA           | Imatinib            | chemotherapy                                   | died (25M)                        |
| 10        | 57               | M      | 25/NA/NA      | aCML       | 10                     | 1.9                       | NA                  |               | NA           | no                  | IFN                                            | Alive (15Y)                       |
| 11        | 36               | M      | 55/NA/NA      | aCML       | 3                      | 1.7                       | 2                   |               | yes          | Imatinib            | HU                                             | Alive(5Y)                         |
| 12        | 46               | F      | NA            | aCML       | yes                    | 2.5                       | yes                 |               | NA           | Yes                 | No                                             | Yes (22M FU)                      |
| 13        | 24               | F      | 99/11.3/261   | CML        | 4                      | 4.0                       | 1                   |               | yes          | Imatinib            |                                                | Alive (10M)                       |
| 14        | 54               | M      | 22/12.6/294   | CML        | yes                    | NA                        | NA                  |               | No           | NA                  | NA                                             | NA                                |
| 15        | 65               | F      | 22/11.1/63    | MPN        | yes (marrow)           | NA                        | no                  |               | NA           | No                  | chemotherapy                                   | Died (12M)                        |
| 16        | 61               | F      | 92/11.4/400   | MPN        | 12                     | 11.0                      | 10                  |               | yes          | Imatinib, nilotinib |                                                | Alive (CR17m, relapse then CR11M) |
| 17        | 31               | M      | 51/11.3/438   | MPN        | 11                     | 5.6                       | NA                  | T-ALL (in LN) | NA           | dasatinib           | Chemotherapy-Allo-SCT                          | Died (11M)                        |
| 18        | 59               | M      | 25/NA/NA      | MPN        | yes                    | NA                        | NA                  |               | NA           | Imatinib            | chemotherapy                                   | died(64M)                         |
| 19        | 68               | M      | 52/NA/NA      | MPN        | NA                     | NA                        | NA                  |               | NA           | Nilo                |                                                | Alive (CR>41M)                    |
| 20        | 77               | M      | 15/13.2/246   | MPN        | 3.5                    | 0.5                       | 4                   |               | no           | na                  | na                                             | na                                |
| 21        | 47               | M      | 50/NA/NA      | MPN        | yes                    | NA                        | NA                  |               | NA           | Imatinib, Dasatinib | None                                           | Alive(9Y)                         |
| 22        | 48               | M      | 8/6.5/20      | RAEB-2/AML | yes (marrow)           | NA                        | 1                   |               | NA           | No                  | IA regimen chemotherapy                        | Died (6M)                         |
| 23        | 29               | M      | 40/12.6/139   | AML        | 42                     | 16.8                      | 2                   |               | yes          | No                  | GIMEMA protocol LAM99, then haploidentical SCT | Alive (20M)                       |
| 24        | 81               | M      | na            | AML        | NA                     | NA                        | NA                  |               | NA           | No                  |                                                | Died (3M)                         |

|    |                   |             |                       |     |             |            |            |    |    |              |             |
|----|-------------------|-------------|-----------------------|-----|-------------|------------|------------|----|----|--------------|-------------|
| 25 | 40                | F           | 83/NA/NA              | AML | Yes         | NA         | NA         | NA | No | chemotherapy | Died (4M)   |
|    | Median<br>age: 48 | M:F<br>18:7 | Median<br>40/11.4/249 |     | Median 10.5 | Median 2.9 | Median 2.5 |    |    |              | Median: 13M |

Table S4 Cytogenetic and molecular features of myeloid neoplasms with *ETV6-ABL1* fusion

| Reference | Karyotype                                                                                                                                                                   | FISH/ETV6         | FISH/ABL1               | Fusion Type ( <i>ETV6-ABL1</i> A/B or <i>ETV6-FLT3</i> ) |
|-----------|-----------------------------------------------------------------------------------------------------------------------------------------------------------------------------|-------------------|-------------------------|----------------------------------------------------------|
| 1         | 46,XY,t(12;14)(p12;q11-13)                                                                                                                                                  | 5'ETV6 on 9q34    | ABL1 3'/5' on 9q34      | B                                                        |
| 2         | 46,XY,del(6)(p21),?t(9;12)(q34;p12)                                                                                                                                         | 5'ETV6 on 9q34    | ABL1 3'/5' on 9q34      | B                                                        |
| 3         | 46,XY                                                                                                                                                                       | NA                | ABL1 3'/5' on 9q34      | B                                                        |
| 4         | 46,XX,t(9;12)(q34;p13)                                                                                                                                                      | 5'-3'ETV6 on 9q34 | ABL1 3'/5' on 9q34      | N/A                                                      |
| 5         | 49,XY,+11,t(9;12)(q34;p1?),+der(12)t(9;12),+19,der(22)t(1;22)(q21;q11)                                                                                                      | NA                | 3'ABL1 on 12p           | B, A                                                     |
| 6         | 46,XY                                                                                                                                                                       | 5'-3'ETV6 on 12p  | 3'ABL1 on 12p           | NA                                                       |
| 7         | 45,XY-7,t(9;12)(q34;q13)                                                                                                                                                    | NA                | 3'ABL1 on 12p           | B                                                        |
| 8         | 46,XY,t(12;17)(p11.2;p11.2)                                                                                                                                                 | 5'ETV6 on 17p     | 3'ABL1 on 17p           | B                                                        |
| 9         | 46,XX,der(9)t(9;12)(q34;p13),del(10)(q24),del(11)(q23),der(12)t(10;12)(q24;p13)[8]/46,XX[2].                                                                                |                   | ETV6/ABL1               | B                                                        |
| 10        | 46,XY                                                                                                                                                                       | NA                | 3'ABL1 on 12p           | NA                                                       |
| 11        | 46,XY,t(9;12)(q34;p13)                                                                                                                                                      | NA                | ETV6/ABL1(cytogenetics) | NA                                                       |
| 12        | 46,XX,t(9;12)(q34;p13)                                                                                                                                                      | 5'ETV6 on 9q34    | ABL1 3'/5' on 9q34      | B                                                        |
| 13        | 46,XX                                                                                                                                                                       | 5'ETV6 on 9q34    | ABL1 3'/5' on 9q34      | B, A                                                     |
| 14        | 46,XY,t(9;12)(q34;p13)                                                                                                                                                      |                   | 9q34                    | B                                                        |
| 15        | 46,XX,t(5;9)(q13;q34)                                                                                                                                                       | NA                | 3'ABL1 on 12p           | B, A                                                     |
| 16        | 46,XX                                                                                                                                                                       | 5'-3'ETV6 on 12p  | 3'ABL1 on 12p           | NA                                                       |
| 17        | 46,XY,der(9)t(9;12)(q34;p13),del(12)(p13)[1]/46,sl,t(7;14)(p13;q11.2)[18]/47,add(1),+19[1]                                                                                  | positive          | positive                | B, A                                                     |
| 18        | 46,XY,del(6),t(9;12)(q34;p13)                                                                                                                                               | NA                | 3'ABL1 on 12p           | B, A                                                     |
| 19        | 46,XY,t(5;12;16)                                                                                                                                                            | abnormal          | abnormal                | B, A                                                     |
| 20        | 46,XY,t(9;12)(q34;p13)                                                                                                                                                      | NA                | NA                      | na                                                       |
| 21        | 46,XY,add(9)(q34),der(12)ins(12;9)(p13;q34q34),t(21;22)(q21;q11.2)[20]                                                                                                      | NA                | ABL1X3                  | NA                                                       |
| 22        | 46,XY,t(9;12)(q34;p13)                                                                                                                                                      | NA                | 3'ABL1 on 12p           | B                                                        |
| 23        | 46,XY,t(8;12)(p21;p13)                                                                                                                                                      | 5'ETV6 on 8p21    | 3'ABL1 on 8p21          | A                                                        |
| 24        | 45,add(X)(p11),Y,23,der(3)t(3;15)(q12;q15),t(4;7)(q21;q22),25,t(9;12;14)(q34;p13;q22),del(12)(p11p13),der(15)del(15)(q11q15),t(3;15)(q12;q15),der(18)t(3;18)(q11;q1?2),1mar | NA                | NA                      | B                                                        |
| 25        | 46,XY                                                                                                                                                                       | 5'-3'ETV6 on 12p  | 3'ABL1 on 12p           | B                                                        |

## References for supplemental table

1. Andreasson P, Johansson B, Carlsson M, et al. BCR/ABL-negative chronic myeloid leukemia with ETV6/ABL fusion. *Genes Chromosomes Cancer*. 1997;20(3):299-304.
2. Van Limbergen H, Beverloo HB, van Drunen E, et al. Molecular cytogenetic and clinical findings in ETV6/ABL1-positive leukemia. *Genes Chromosomes Cancer*. 2001;30(3):274-282.
3. Lin H, Guo JQ, Andreeff M, Arlinghaus RB. Detection of dual TEL-ABL transcripts and a Tel-Abl protein containing phosphotyrosine in a chronic myeloid leukemia patient. *Leukemia*. 2002;16(2):294-297.
4. Keung YK, Beaty M, Steward W, Jackle B, Pettinati M. Chronic myelocytic leukemia with eosinophilia, t(9;12)(q34;p13), and ETV6-ABL gene rearrangement: case report and review of the literature. *Cancer Genet Cytogenet*. 2002;138(2):139-142.
5. O'Brien SG, Vieira SA, Connors S, et al. Transient response to imatinib mesylate (STI571) in a patient with the ETV6-ABL t(9;12) translocation. *Blood*. 2002;99(9):3465-3467.
6. Kelly JC, Shahbazi N, Scheerle J, et al. Insertion (12;9)(p13;q34q34): a cryptic rearrangement involving ABL1/ETV6 fusion in a patient with Philadelphia-negative chronic myeloid leukemia. *Cancer Genet Cytogenet*. 2009;192(1):36-39.
7. Barbouti A, Ahlgren T, Johansson B, et al. Clinical and genetic studies of ETV6/ABL1-positive chronic myeloid leukaemia in blast crisis treated with imatinib mesylate. *Br J Haematol*. 2003;122(1):85-93.
8. Tirado CA, Siangchin K, Shabsovich DS, Sharifian M, Schiller G. A novel three-way rearrangement involving ETV6 (12p13) and ABL1 (9q34) with an unknown partner on 3p25 resulting in a possible ETV6-ABL1 fusion in a patient with acute myeloid leukemia: a case report and a review of the literature. *Biomark Res*. 2016;4(1):16.
9. Kakadia PM, Schmidmaier R, Volkl A, et al. An ETV6-ABL1 fusion in a patient with chronic myeloproliferative neoplasm: Initial response to Imatinib followed by rapid transformation into ALL. *Leuk Res Rep*. 2016;6:50-54.
10. Mozziconacci MJ, Sainty D, Chabannon C. A fifteen-year cytogenetic remission following interferon treatment in a patient with an indolent ETV6-ABL positive myeloproliferative syndrome. *Am J Hematol*. 2007;82(7):688-689.
11. Perna F, Abdel-Wahab O, Levine RL, Jhanwar SC, Imada K, Nimer SD. ETV6-ABL1-positive "chronic myeloid leukemia": clinical and molecular response to tyrosine kinase inhibition. *Haematologica*. 2011;96(2):342-343.
12. Gancheva K, Virchis A, Howard-Reeves J, et al. Myeloproliferative neoplasm with ETV6-ABL1 fusion: a case report and literature review. *Mol Cytogenet*. 2013;6(1):39.
13. Kawamata N, Dashti A, Lu D, et al. Chronic phase of ETV6-ABL1 positive CML responds to imatinib. *Genes Chromosomes Cancer*. 2008;47(10):919-921.

14. Choi SI, Jang MA, Jeong WJ, et al. A Case of Chronic Myeloid Leukemia With Rare Variant ETV6/ABL1 Rearrangement. *Ann Lab Med.* 2017;37(1):77-80.
15. Meyer-Monard S, Muhlematter D, Streit A, et al. Broad molecular screening of an unclassifiable myeloproliferative disorder reveals an unexpected ETV6/ABL1 fusion transcript. *Leukemia.* 2005;19(6):1096-1099.
16. Nand R, Bryke C, Kroft SH, Divgi A, Bredeson C, Atallah E. Myeloproliferative disorder with eosinophilia and ETV6-ABL gene rearrangement: efficacy of second-generation tyrosine kinase inhibitors. *Leuk Res.* 2009;33(8):1144-1146.
17. Yamamoto K, Yakushijin K, Nakamachi Y, et al. Extramedullary T-lymphoid blast crisis of an ETV6/ABL1-positive myeloproliferative neoplasm with t(9;12)(q34;p13) and t(7;14)(p13;q11.2). *Ann Hematol.* 2014;93(8):1435-1438.
18. Zaliova M, Moorman AV, Cazzaniga G, et al. Characterization of leukemias with ETV6-ABL1 fusion. *Haematologica.* 2016;101(9):1082-1093.
19. Mori N, Ohwashi-Miyazaki M, Okada M, Yoshinaga K, Shiseki M, Tanaka J. Translocation (9;12)(q34.1;p13.?) Resulted in ETV6-ABL1 Fusion in a Patient with Philadelphia Chromosome-Negative Chronic Myelogenous Leukemia. *Acta Haematol.* 2016;136(4):240-243.
20. Xie W, Wang SA, Hu S, Xu J, Medeiros LJ, Tang G. Myeloproliferative neoplasm with ABL1/ETV6 rearrangement mimics chronic myeloid leukemia and responds to tyrosine kinase inhibitors. *Cancer Genet.* 2018;228-229:41-46.
21. La Starza R, Trubia M, Testoni N, et al. Clonal eosinophils are a morphologic hallmark of ETV6/ABL1 positive acute myeloid leukemia. *Haematologica.* 2002;87(8):789-794.
22. Golub TR, Goga A, Barker GF, et al. Oligomerization of the ABL tyrosine kinase by the Ets protein TEL in human leukemia. *Mol Cell Biol.* 1996;16(8):4107-4116.
23. Park J, Kim M, Lim J, et al. Variant of ETV6/ABL1 gene is associated with leukemia phenotype. *Acta Haematol.* 2013;129(2):78-82.
